# Supplementary material for: Synthesis of 1,2-disubstituted benzimidazoles using an aza-Wittig-equivalent process
Source: Royal Society of Chemistry journal article supplement (doi:10.1039/c7ra09010b), 2017-01-01
Supplement: c7ra09010b1.pdf [file c7ra09010b1.pdf]

## Supplementary Materials for

### **Synthesis of 1,2-disubstituted Benzimidazoles using an Aza-Wittig-Equivalent Process**

*Yuan Chen, Fanghui Xu and Zihua Sun\**

*College of Chemistry and Chemical Engineering, Shanghai University of Engineering  
Science, 333 Longteng Road, Shanghai 201620, China*

*\* Corresponding author: Zihua Sun*

*E-mail address: [sungaris@gmail.com](mailto:sungaris@gmail.com)*

# 1. Experimental

## 1.1 Preparation of Substrates

General procedure for the preparation of **1a-1o**

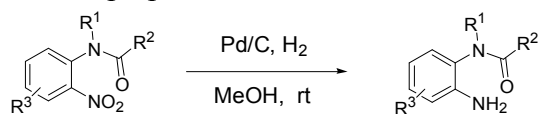

A MeOH solution of ortho-nitroaniline derivatives (0.5 mmol) was added Pd/C (200 mg). The reaction was filled up with H<sub>2</sub> and stirred for 10 h. The mixture was filtered to recycle the catalyst and solvent was evaporated in vacuo. The residue was purified by silica-gel column chromatography with CH<sub>2</sub>Cl<sub>2</sub> as an eluent. Recrystallization from CH<sub>2</sub>Cl<sub>2</sub>/Hexane gave the white solid **1**.

## 1.2 Additional synthesis of **2k**, **2l** and **2n**

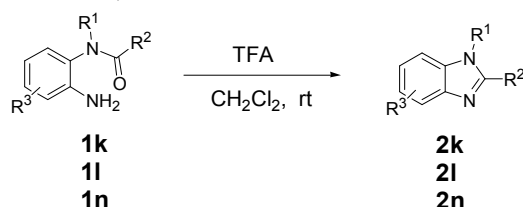

In a 25 mL vial along with a stirring bar, to a mixture of **1** (1.0 mmol) in CH<sub>2</sub>Cl<sub>2</sub> (50 mL) under N<sub>2</sub>. TFA (0.5 mmol) was added to the mixture and the reaction was stirred at RT for additional 1 h. The reaction mixture was washed with water; dried over anhydrous Na<sub>2</sub>SO<sub>4</sub> and evaporated in vacuo. The residue was purified by silica-gel column chromatography with CH<sub>2</sub>Cl<sub>2</sub>/PE as an eluent. Recrystallization from CH<sub>2</sub>Cl<sub>2</sub>/Hexane gave the white solid **2**. (**2k**, 25%; **2l**, 34%; **2n**, 23%)

## 1.3 Additional synthesis of **2h**

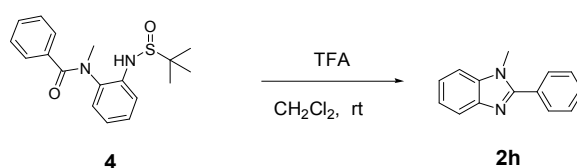

In a 25 mL vial along with a stirring bar, to a mixture of **4** (1.0 mmol) in CH<sub>2</sub>Cl<sub>2</sub> (50 mL) under N<sub>2</sub>. TFA (0.5 mmol) was added to the mixture and the reaction was stirred at RT for additional 1 h. The reaction mixture was washed with water; dried over anhydrous Na<sub>2</sub>SO<sub>4</sub> and evaporated in vacuo. The residue was purified by silica-gel column chromatography with CH<sub>2</sub>Cl<sub>2</sub>/PE as an eluent. Recrystallization from CH<sub>2</sub>Cl<sub>2</sub>/Hexane gave the white solid **2h** (96%).

## 2. Spectra of compounds

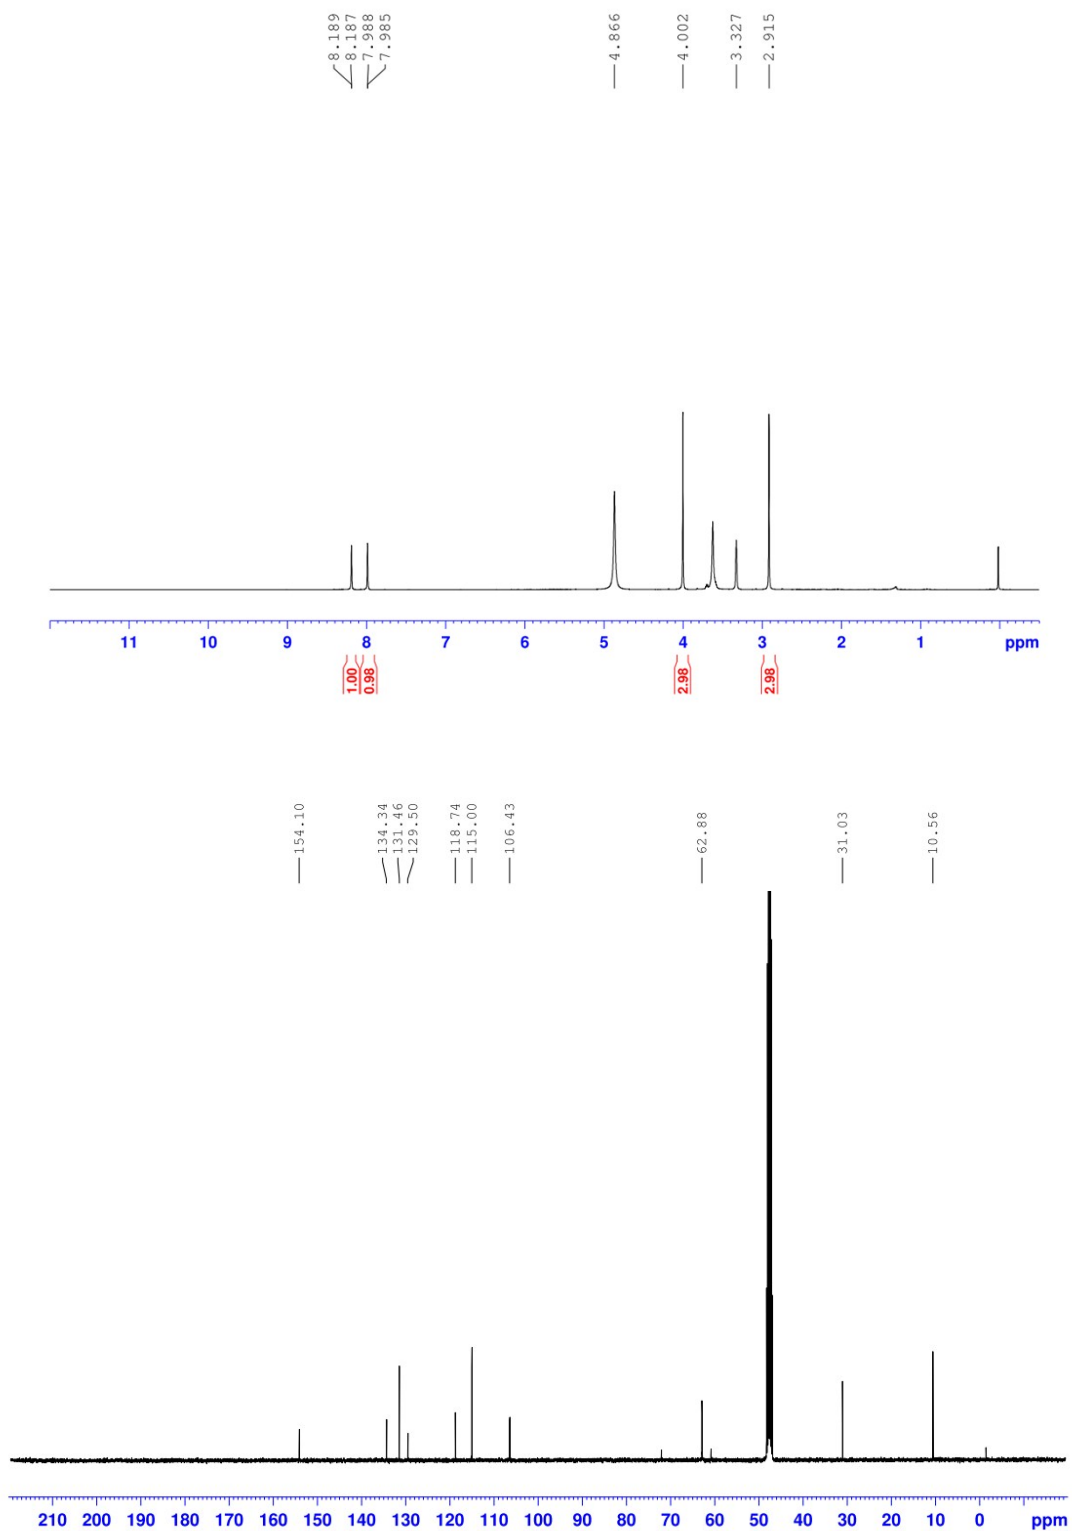

Figure S1.  $^1\text{H}$  and  $^{13}\text{C}$  NMR spectra of 2a in MeOD.

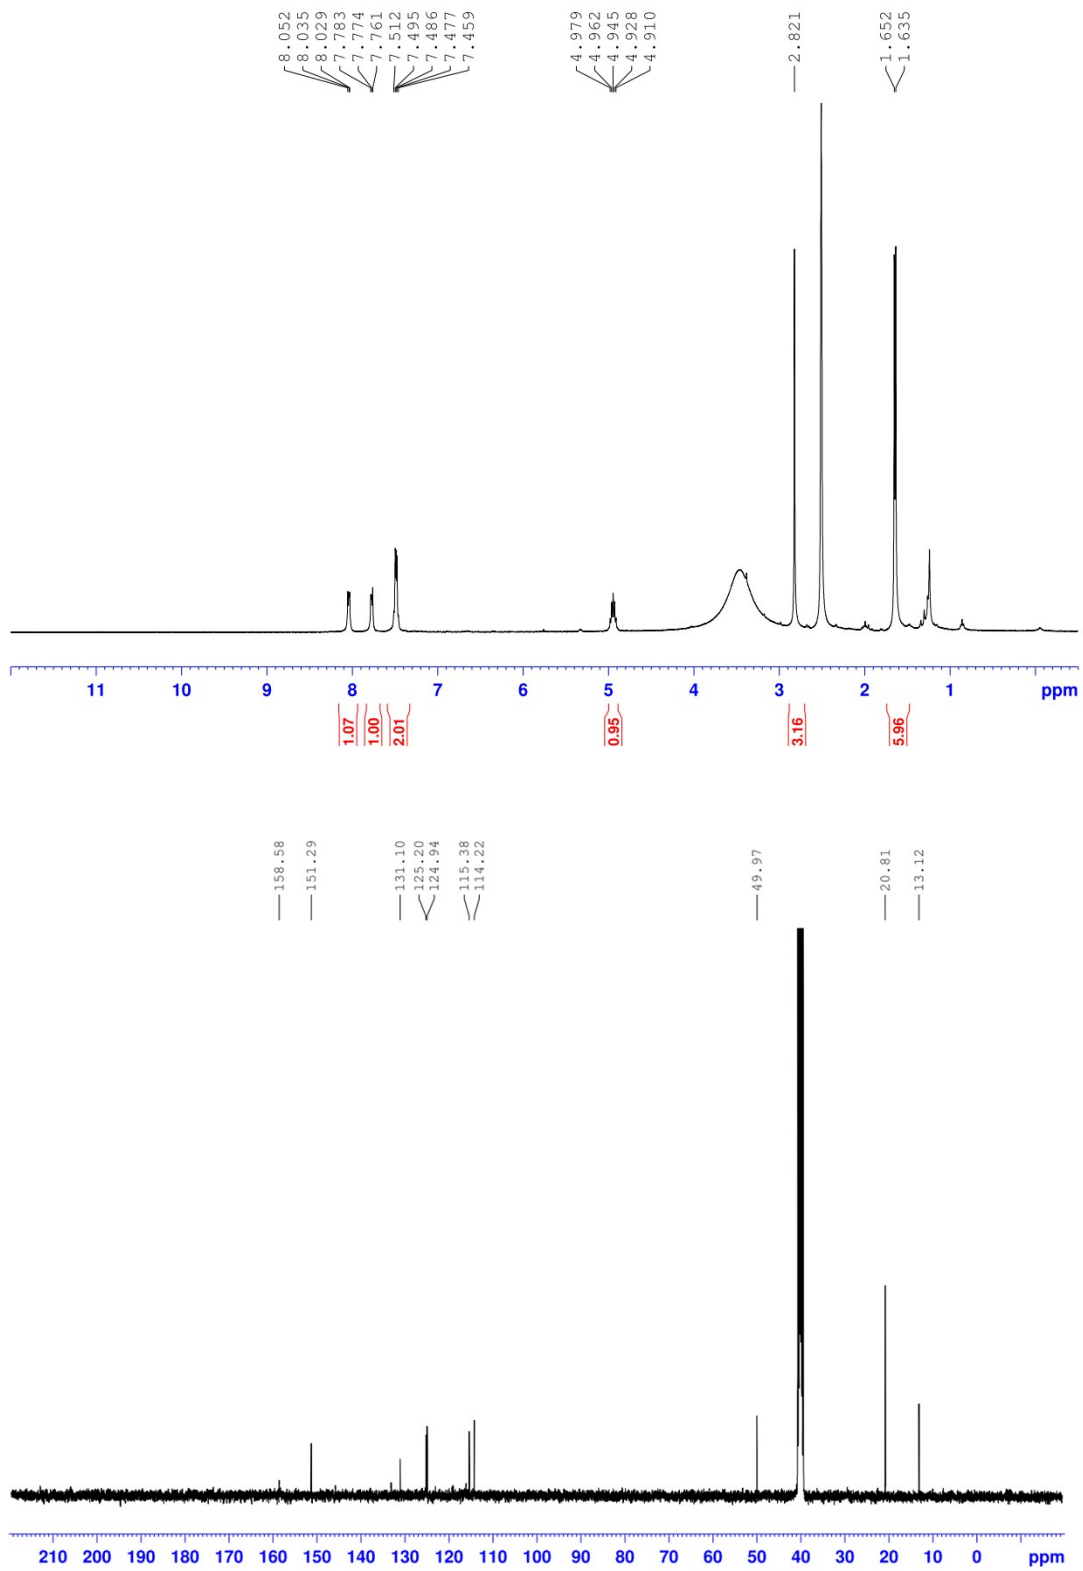

Figure S2. <sup>1</sup>H and <sup>13</sup>C NMR spectra of **2b** in DMSO-*d*<sub>6</sub>.

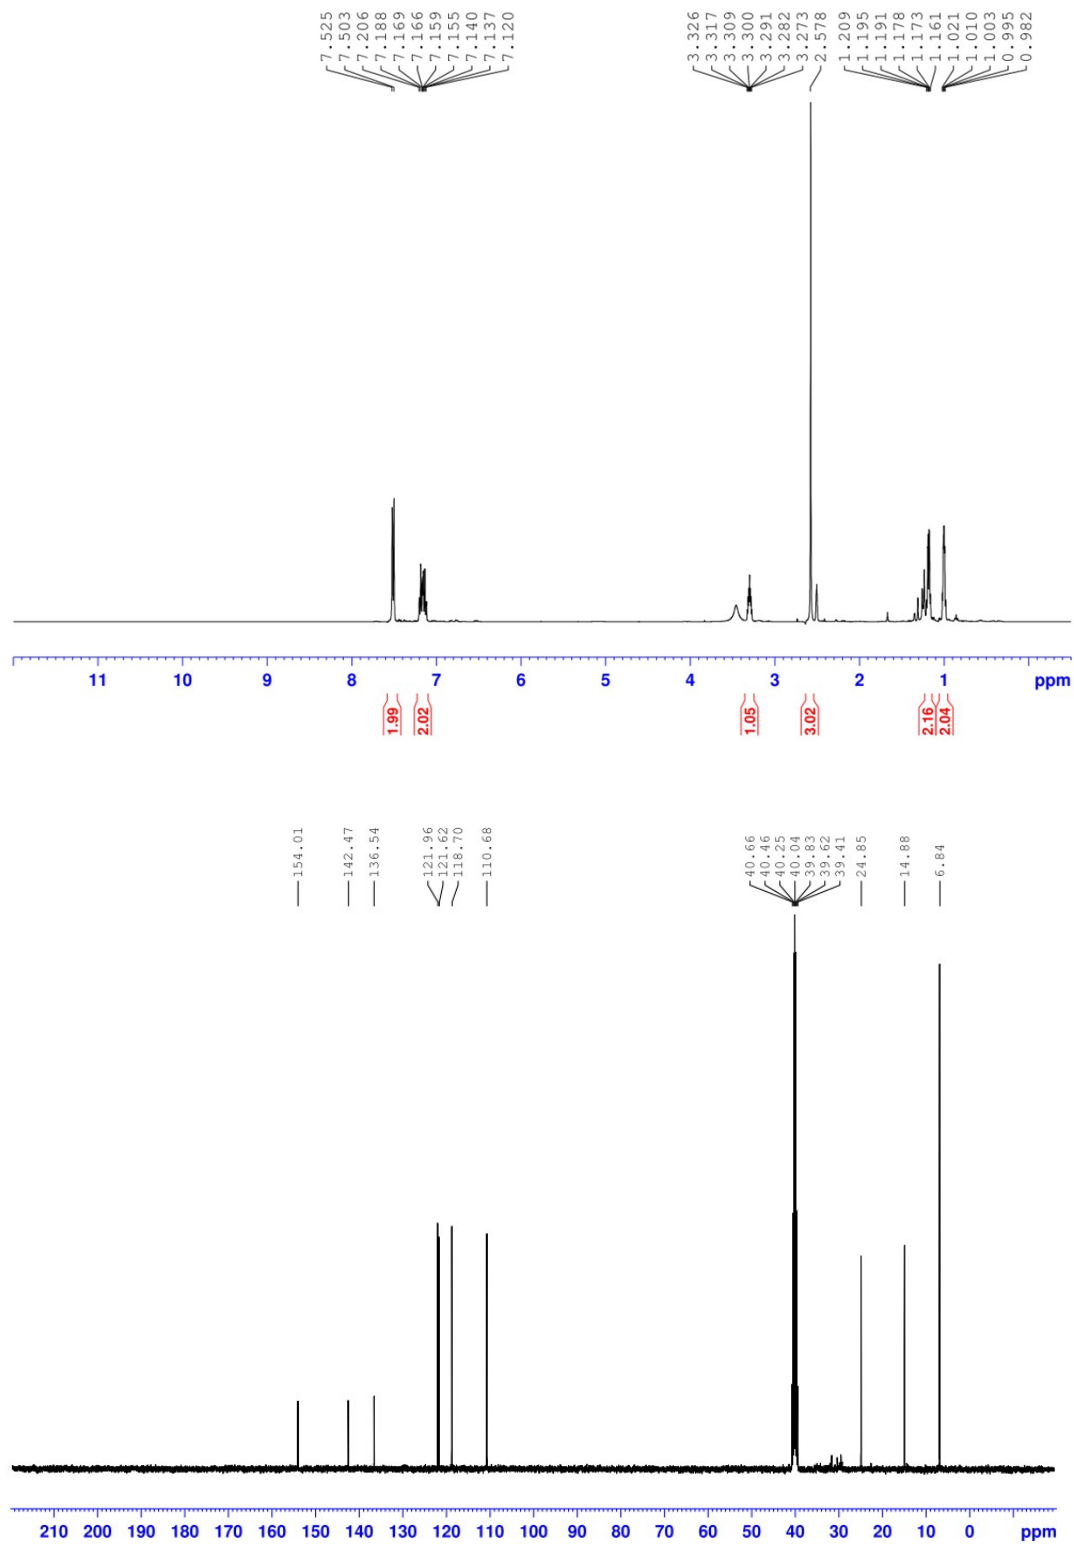

**Figure S3.** <sup>1</sup>H and <sup>13</sup>C NMR spectra of **2c** in DMSO-*d*<sub>6</sub>.

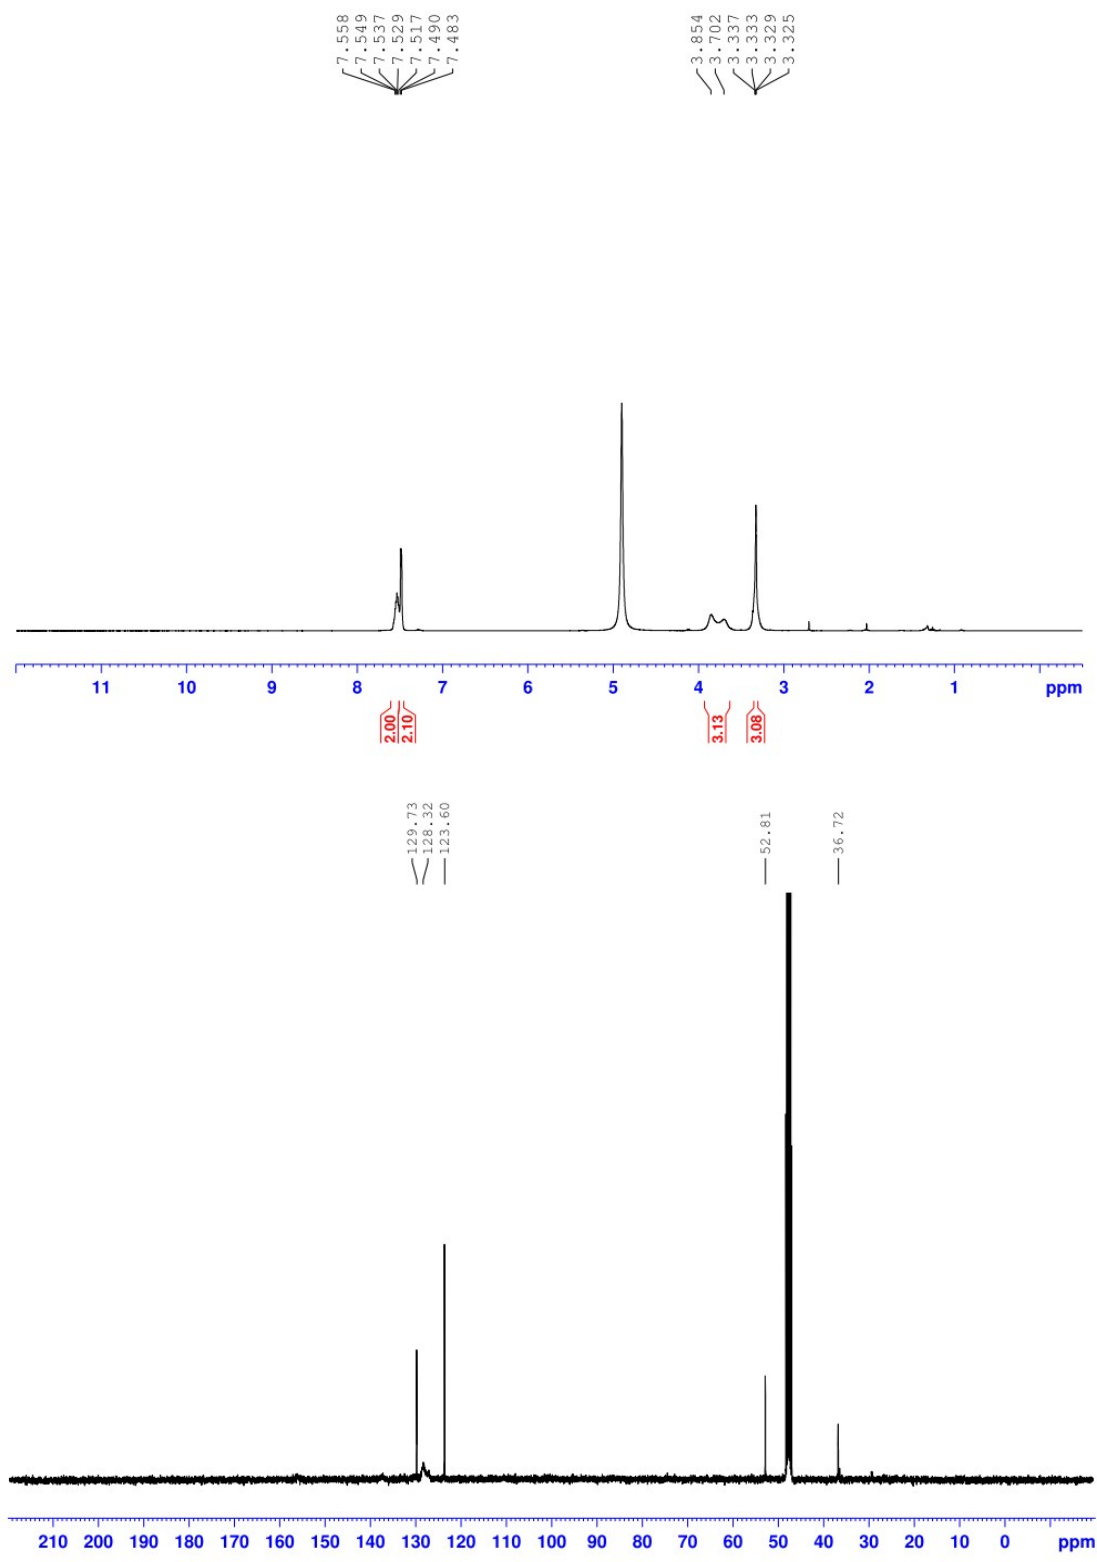

**Figure S4.**  $^1\text{H}$  and  $^{13}\text{C}$  NMR spectra of **2d** in MeOD.

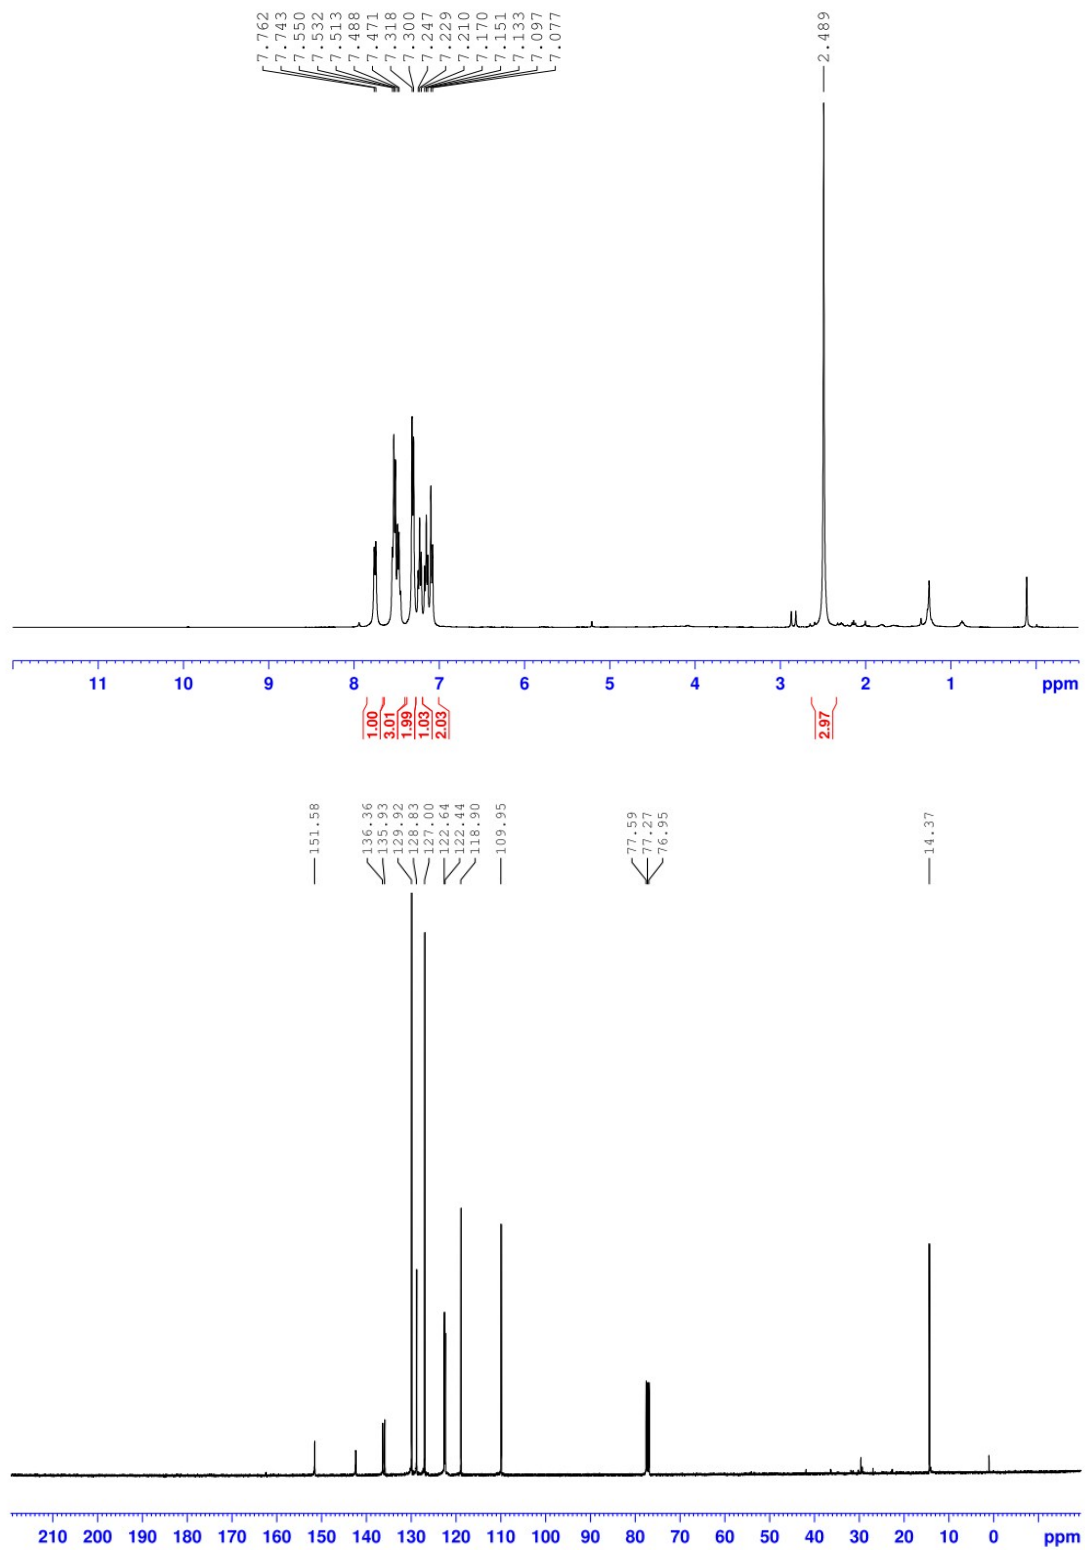

Figure S5. <sup>1</sup>H and <sup>13</sup>C NMR spectra of **2e** in CDCl<sub>3</sub>.

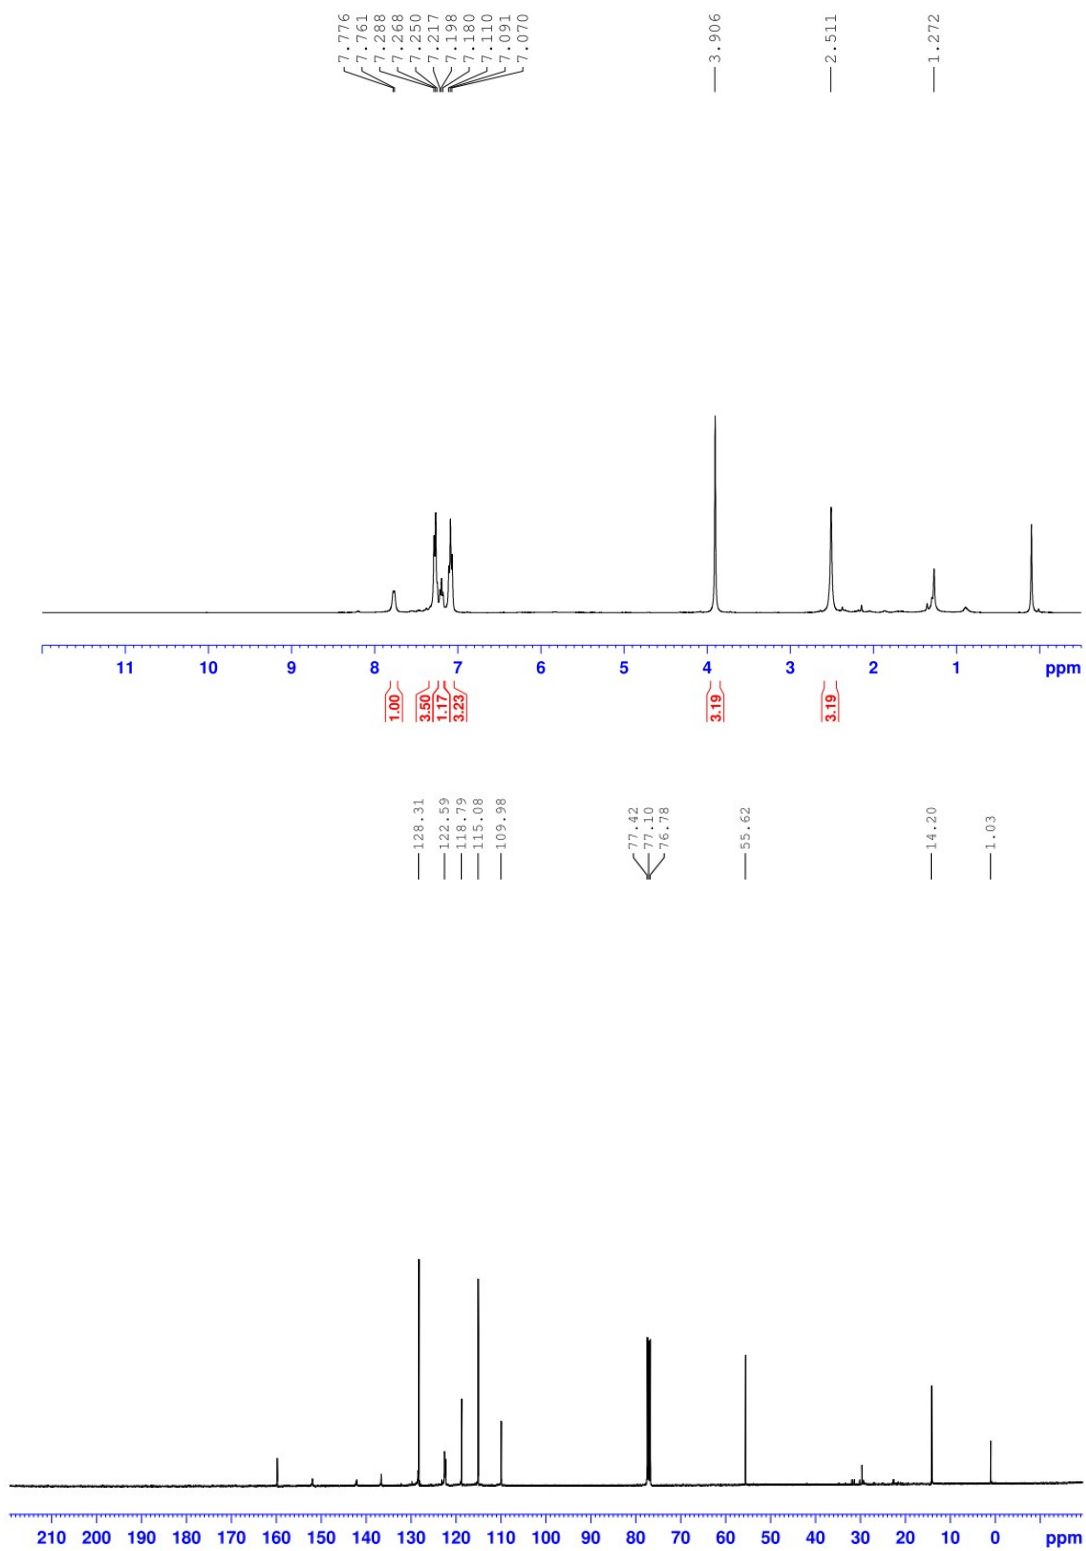

Figure S6. <sup>1</sup>H and <sup>13</sup>C NMR spectra of **2f** in CDCl<sub>3</sub>.



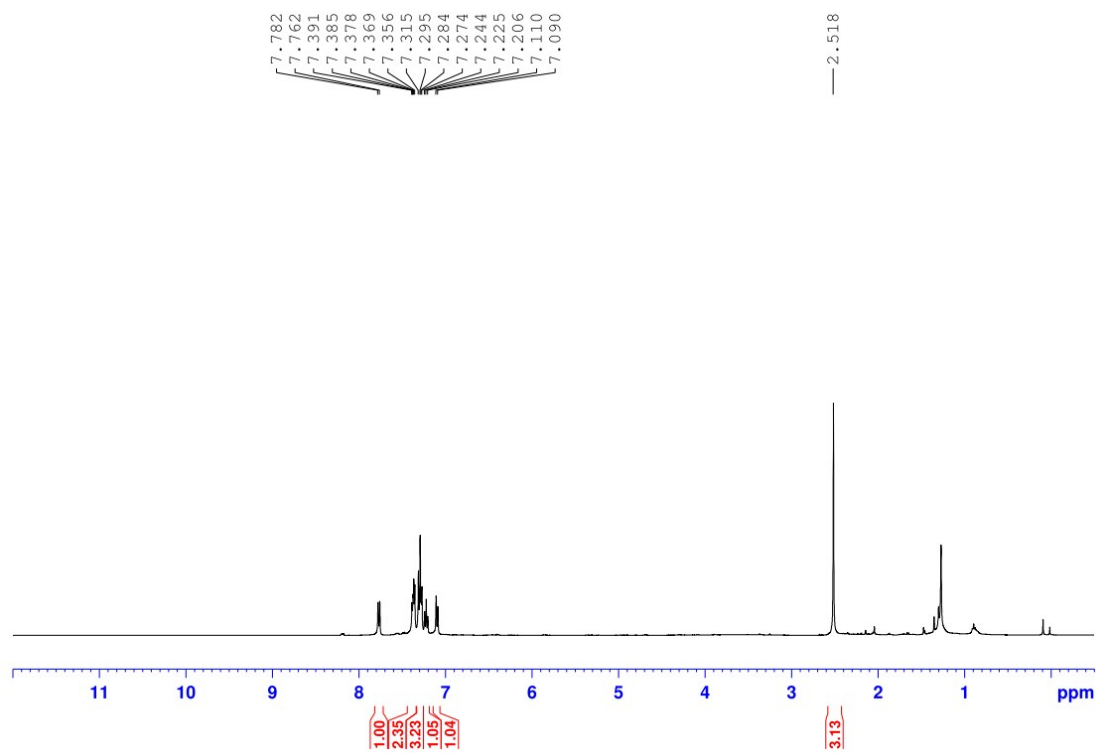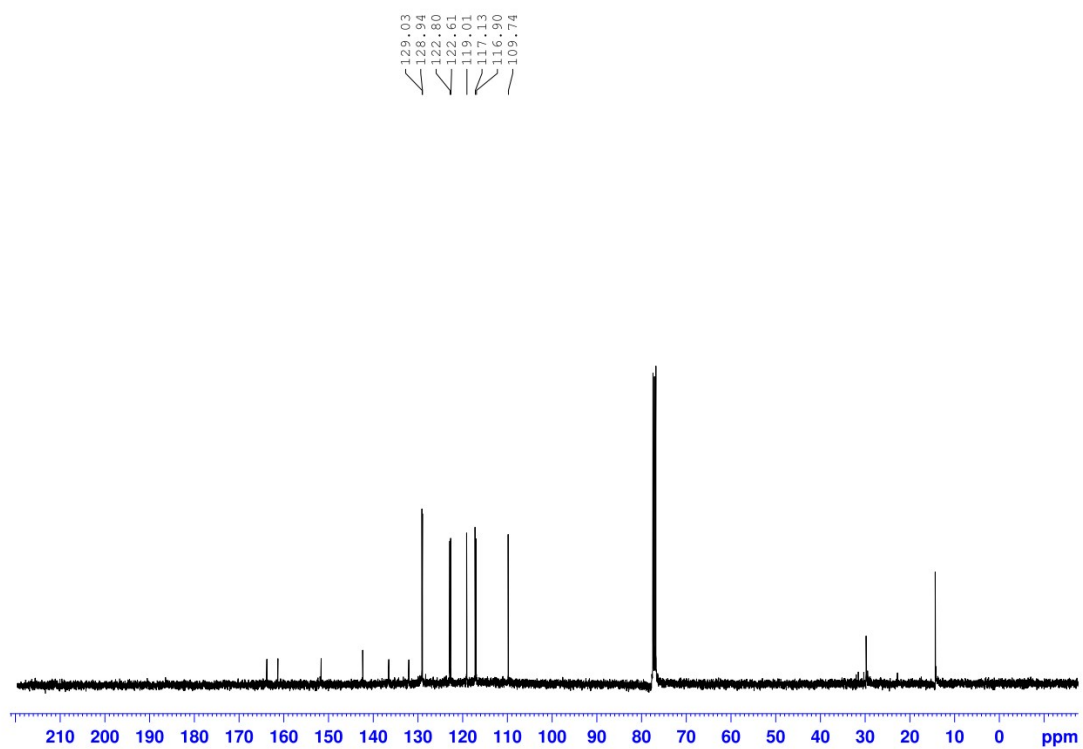

Figure S7.  $^1\text{H}$  and  $^{13}\text{C}$  NMR spectra of **2g** in  $\text{CDCl}_3$ .

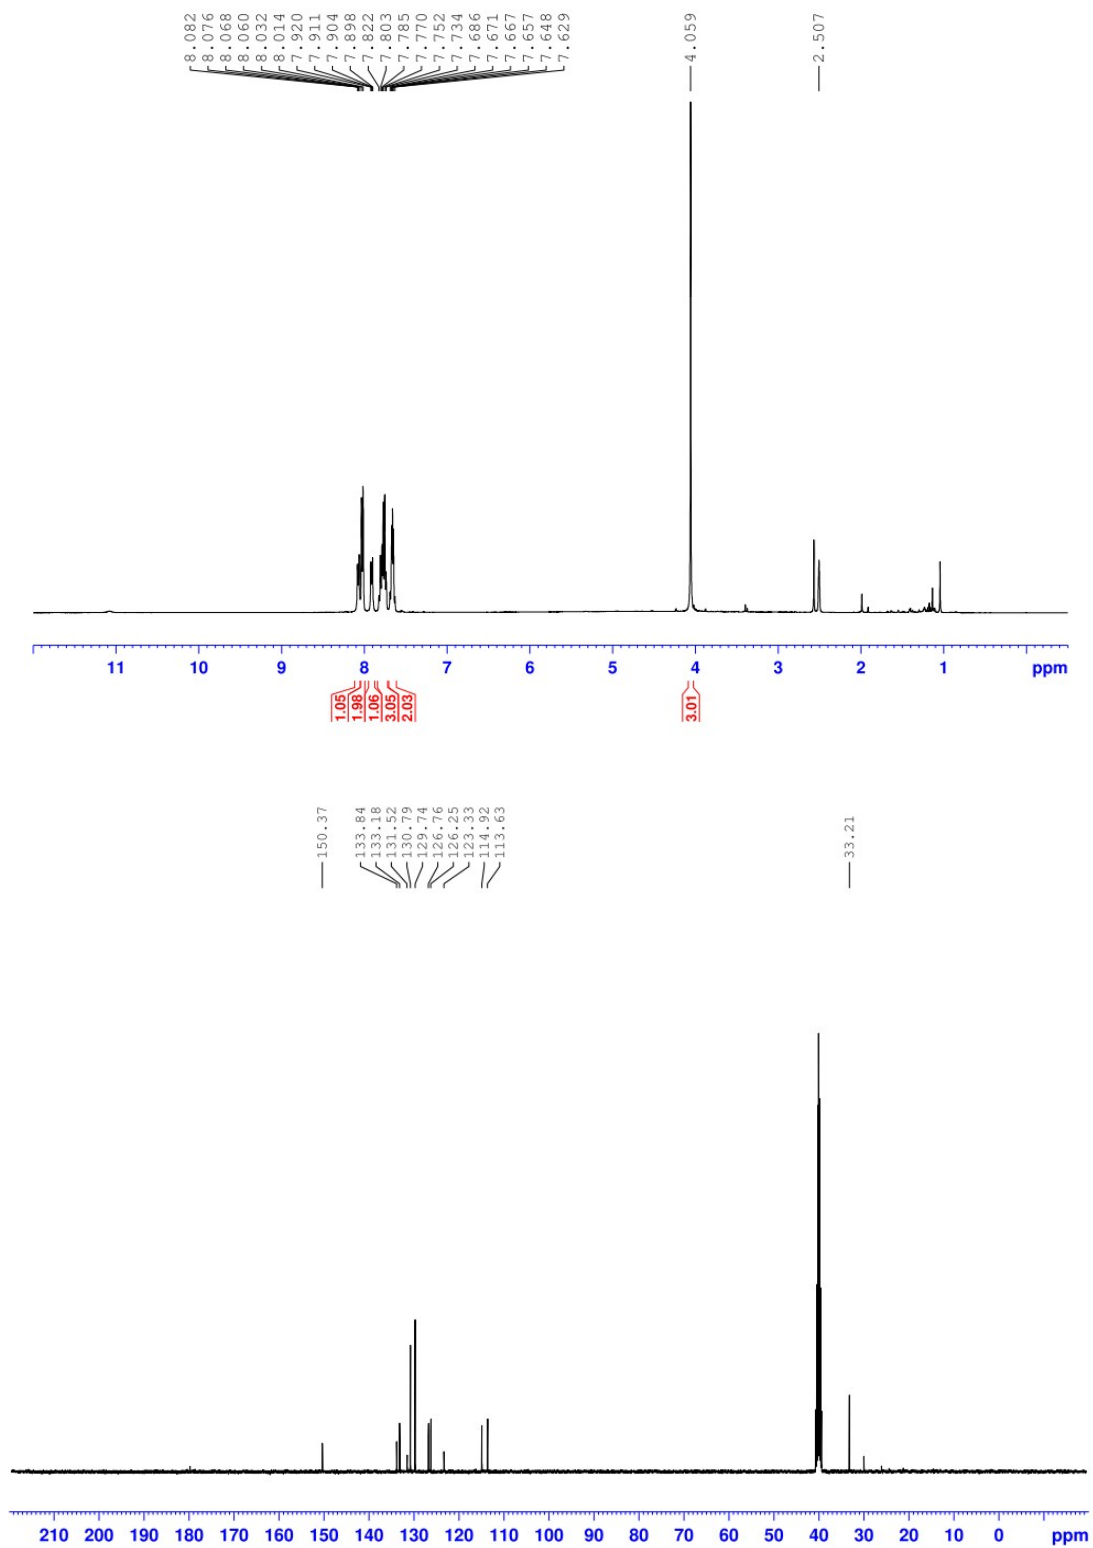

**Figure S8.** <sup>1</sup>H and <sup>13</sup>C NMR spectra of **2h** in DMSO-*d*<sub>6</sub>.

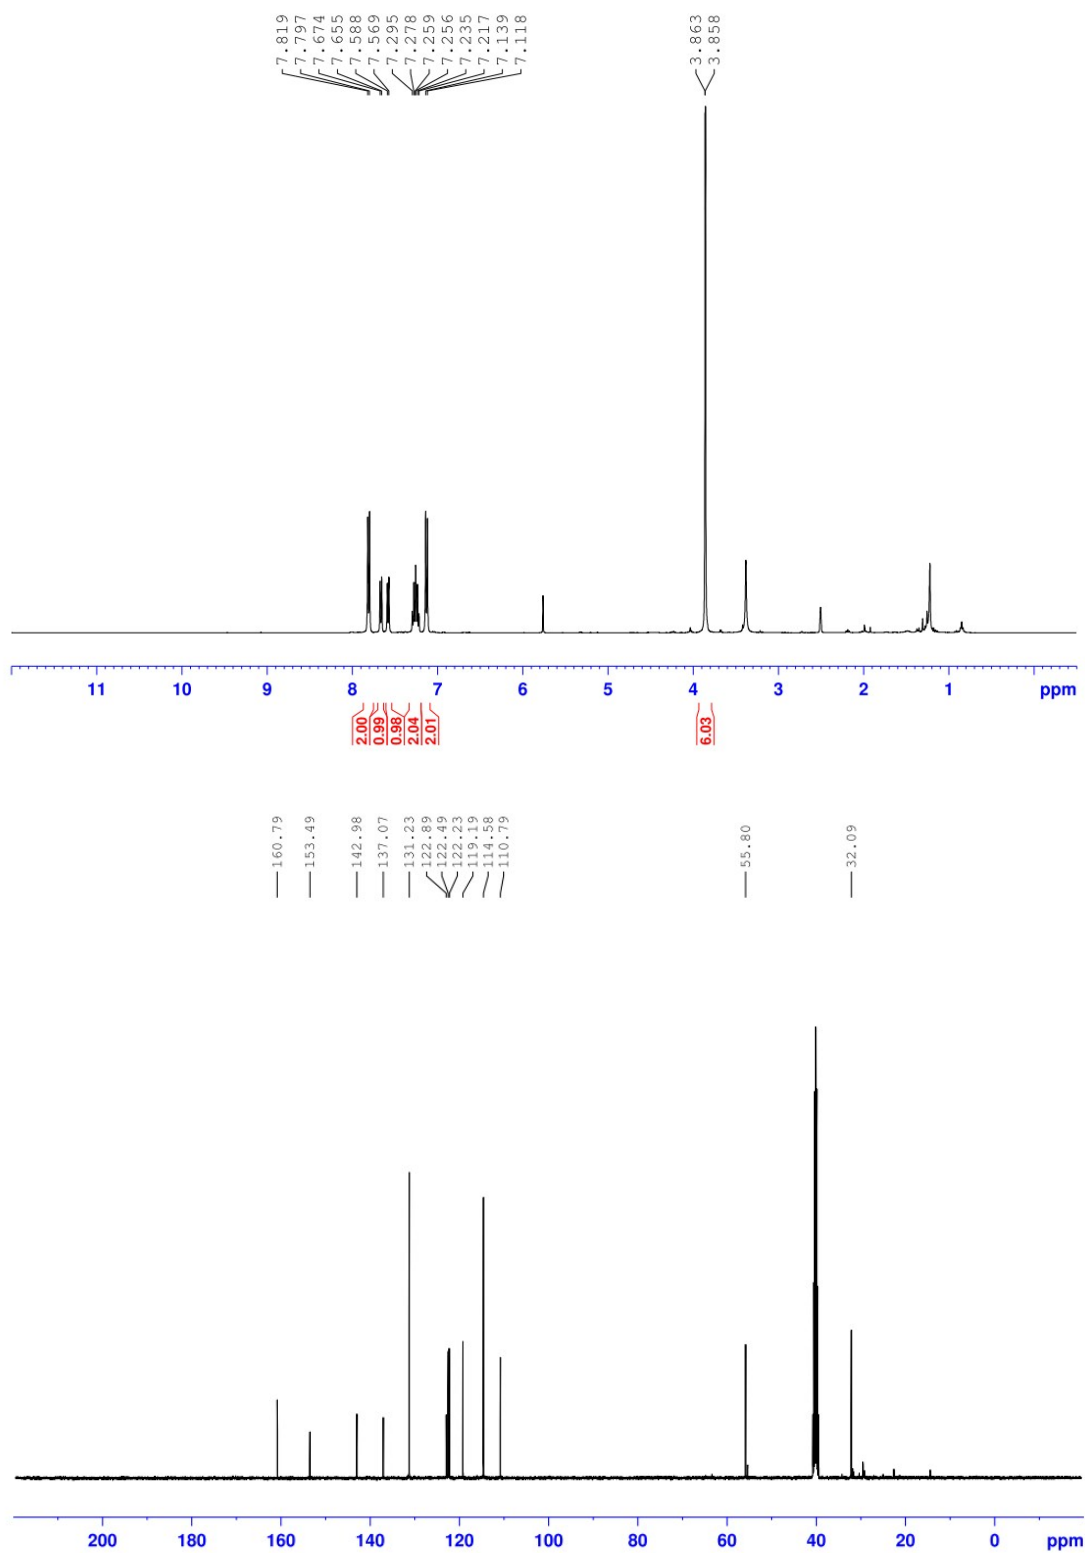

**Figure S9.** <sup>1</sup>H and <sup>13</sup>C NMR spectra of **2i** in DMSO-*d*<sub>6</sub>.

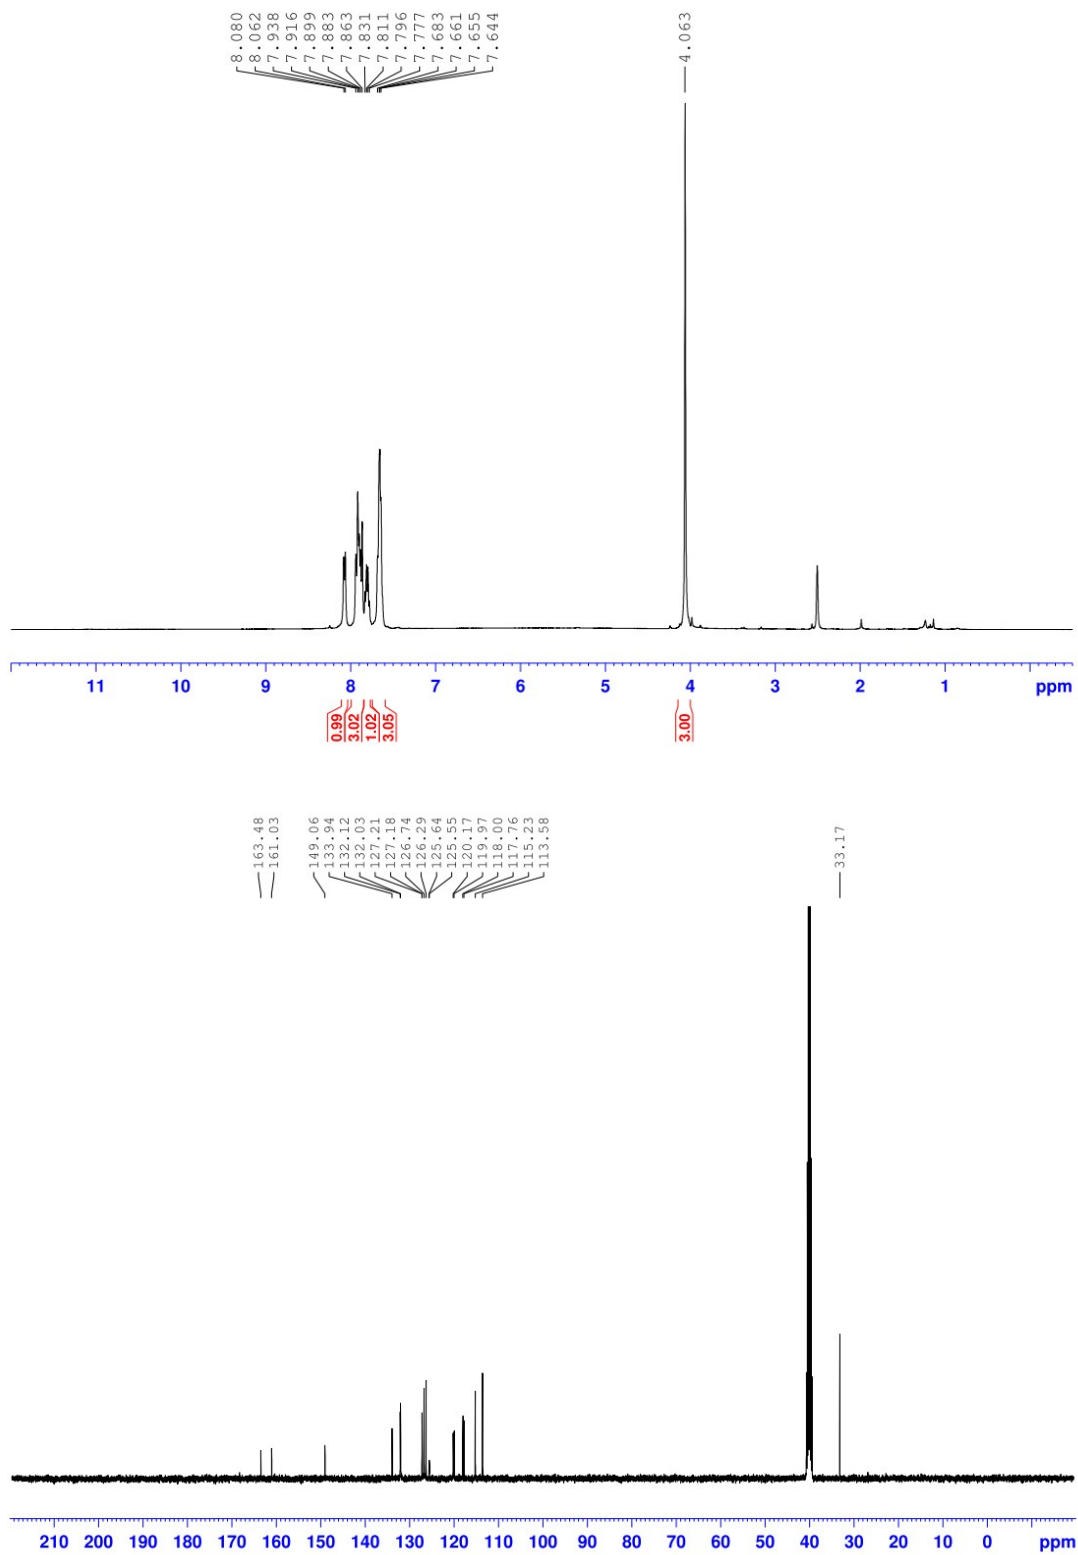

Figure S10. <sup>1</sup>H and <sup>13</sup>C NMR spectra of **2j** in DMSO-*d*<sub>6</sub>.

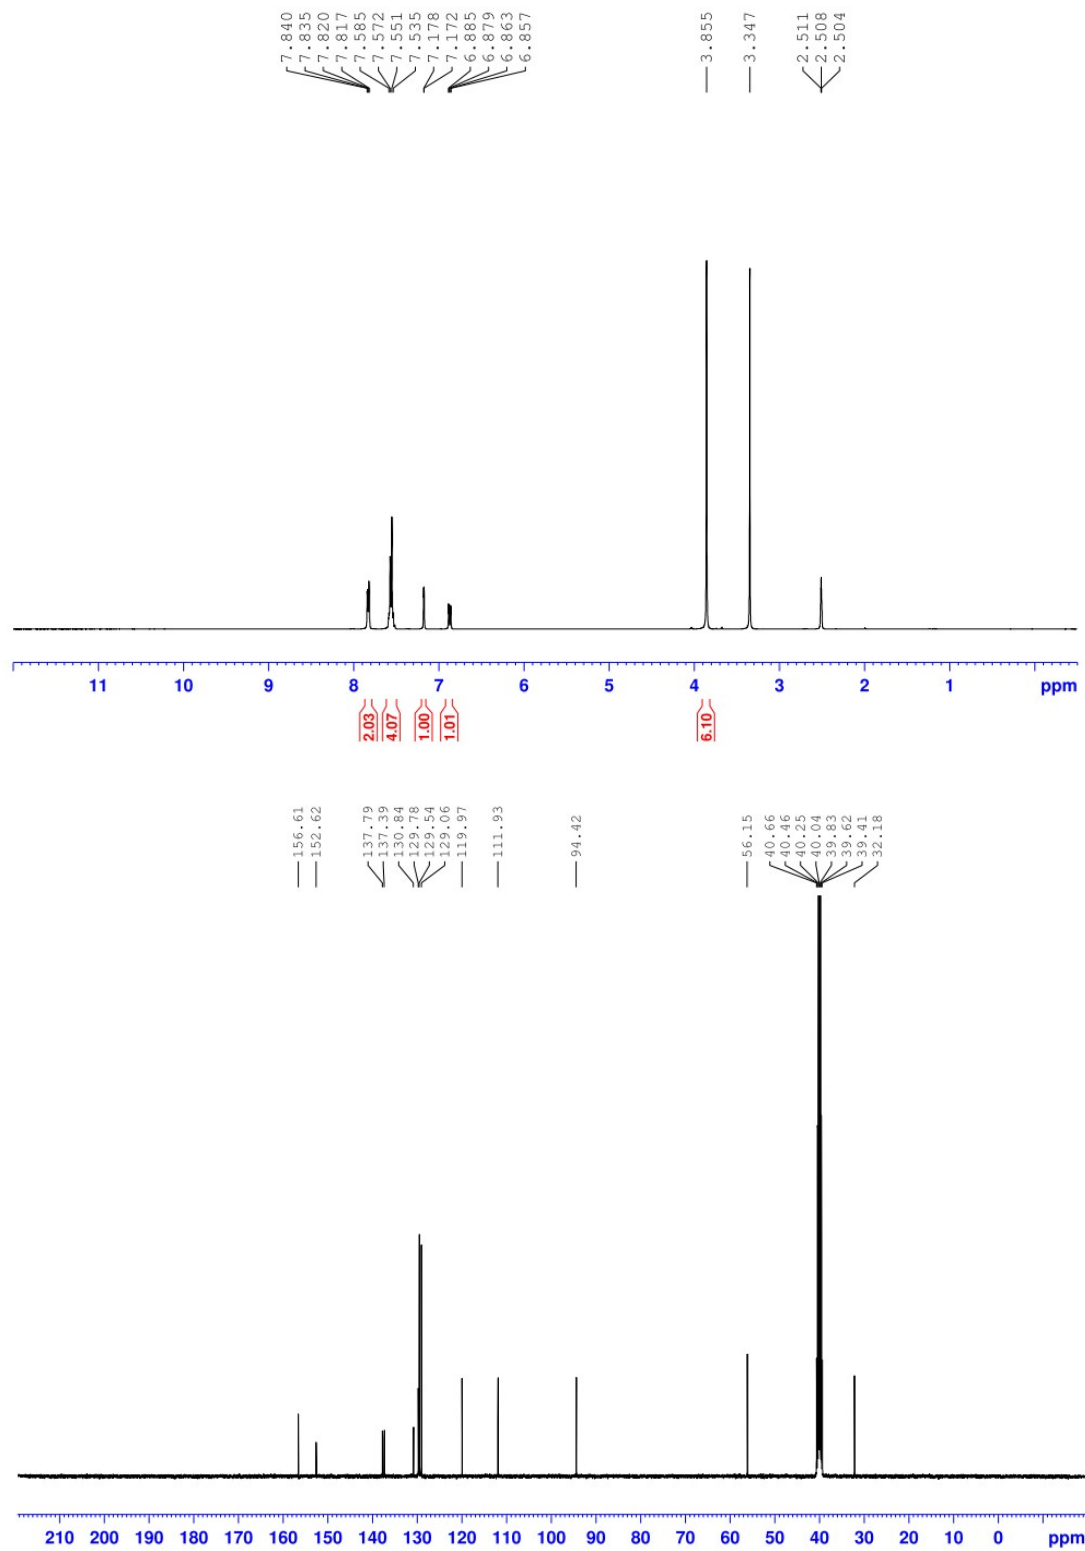

Figure S11.  $^1\text{H}$  and  $^{13}\text{C}$  NMR spectra of **2k** in  $\text{DMSO-}d_6$ .

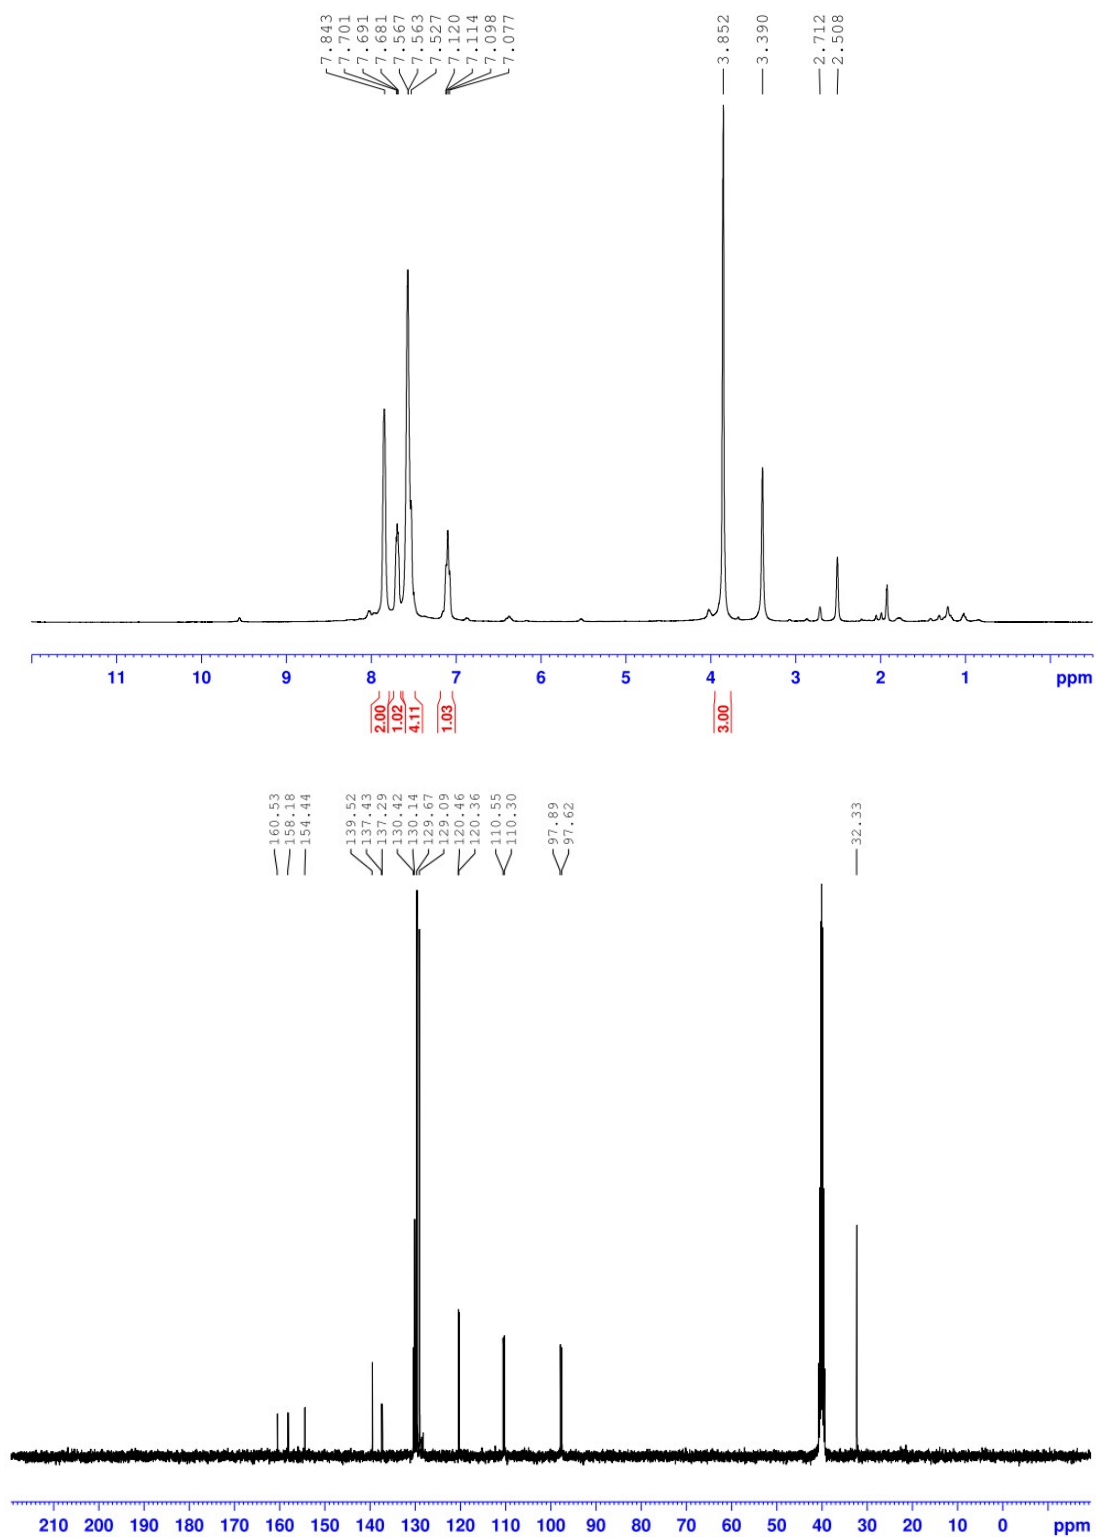

Figure S12. <sup>1</sup>H and <sup>13</sup>C NMR spectra of **2I** in DMSO-*d*<sub>6</sub>.

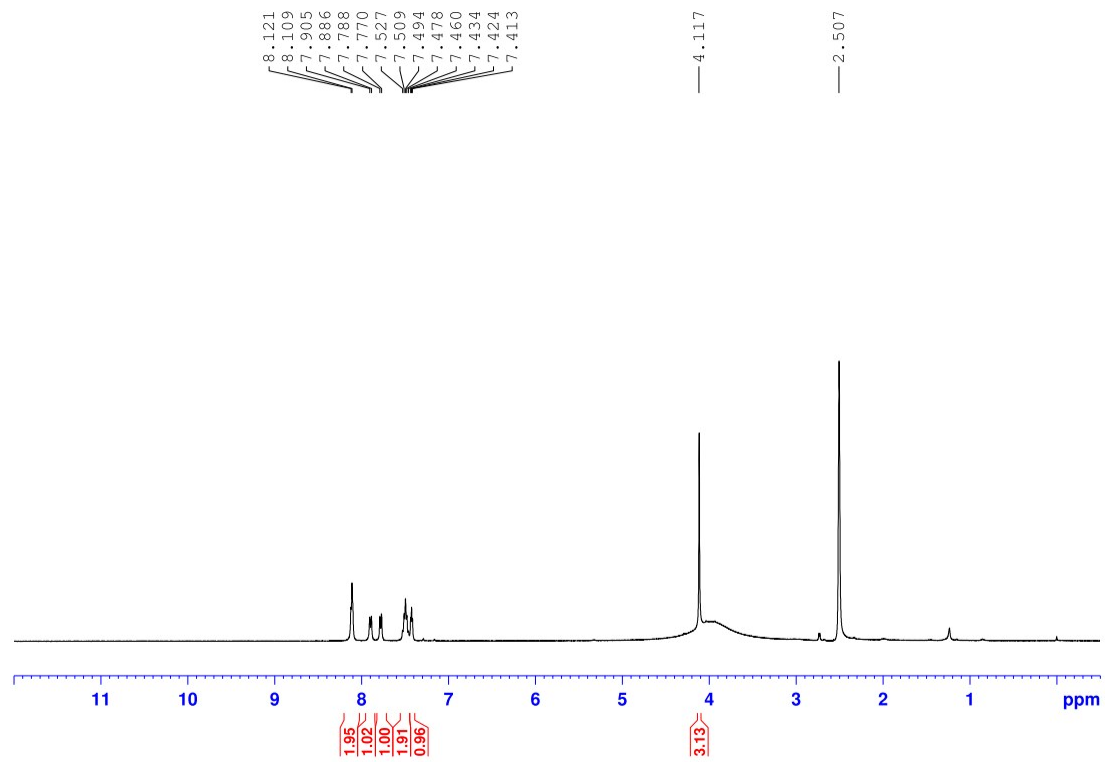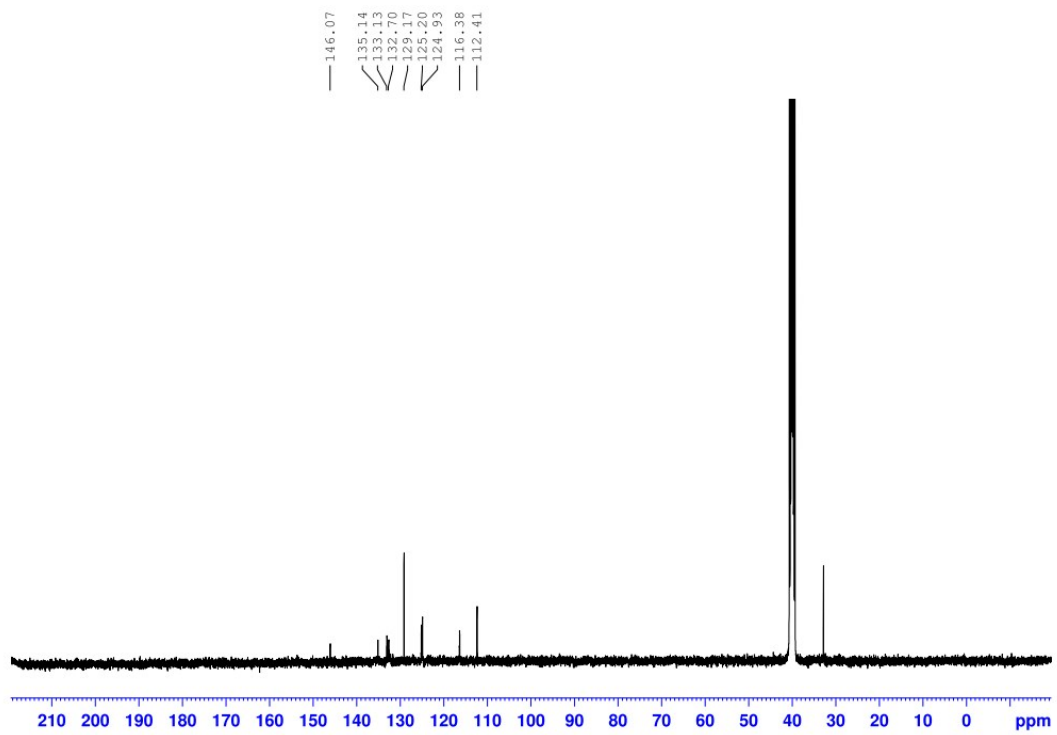

**Figure S13.**  $^1\text{H}$  and  $^{13}\text{C}$  NMR spectra of **2m** in  $\text{DMSO-}d_6$ .

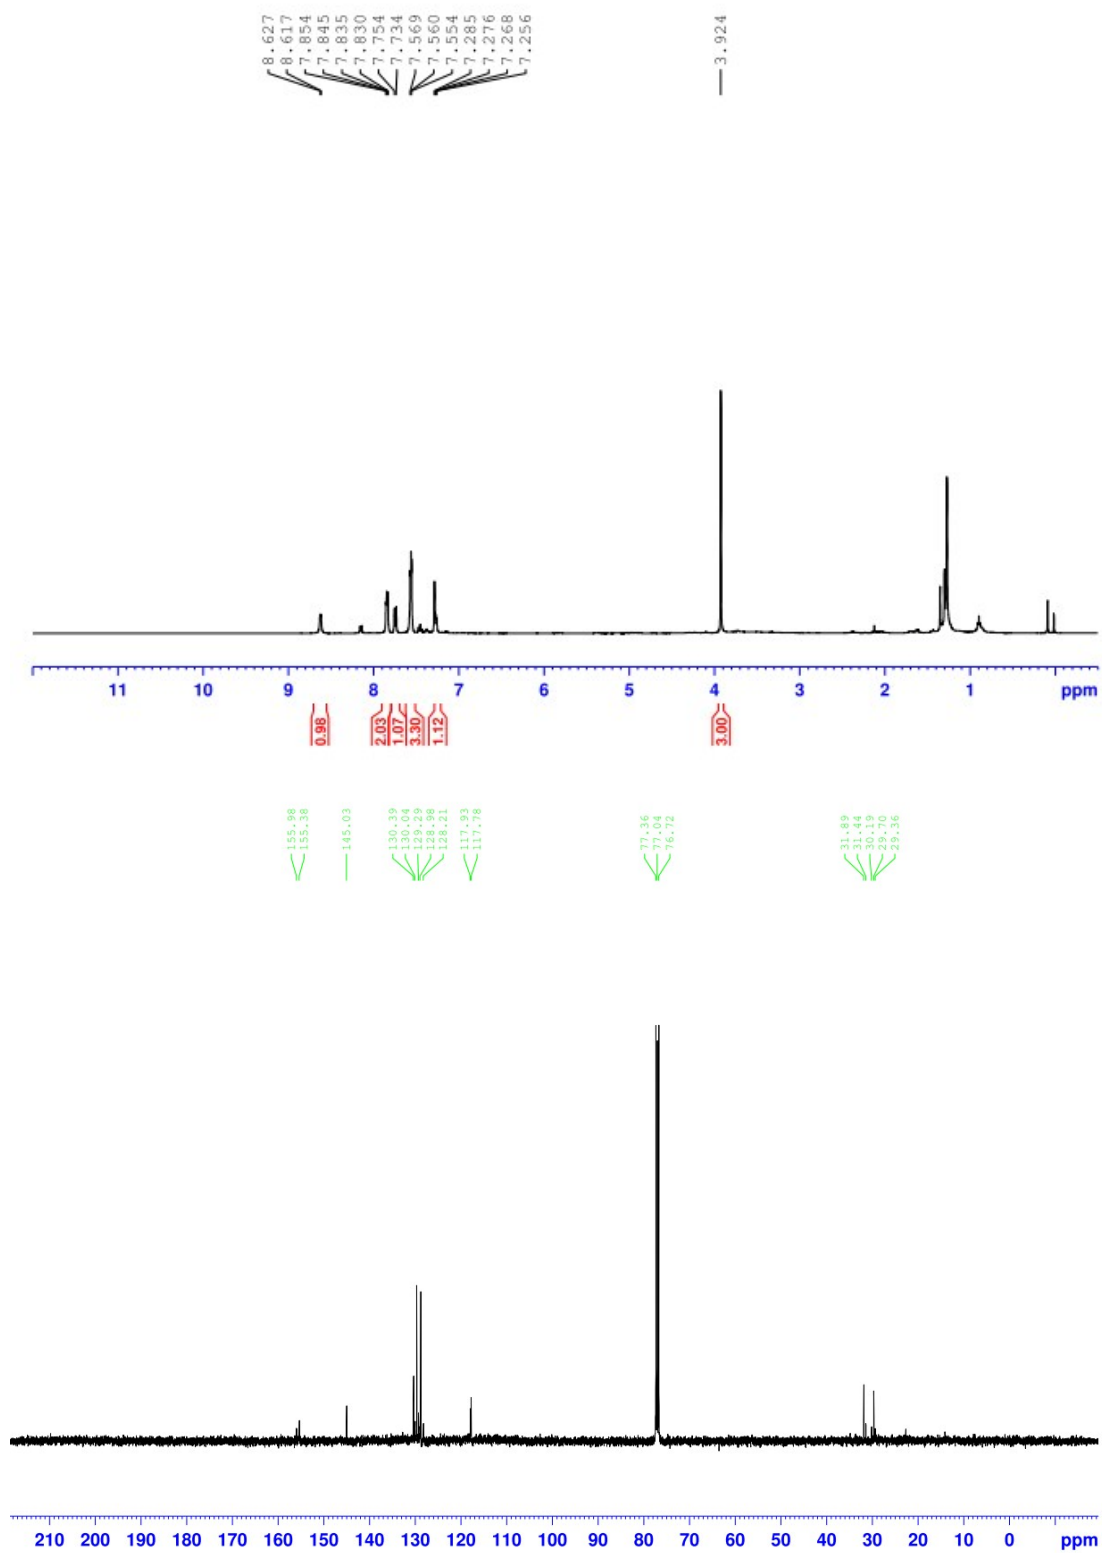

Figure S14. <sup>1</sup>H and <sup>13</sup>C NMR spectra of **2n** in CDCl<sub>3</sub>.



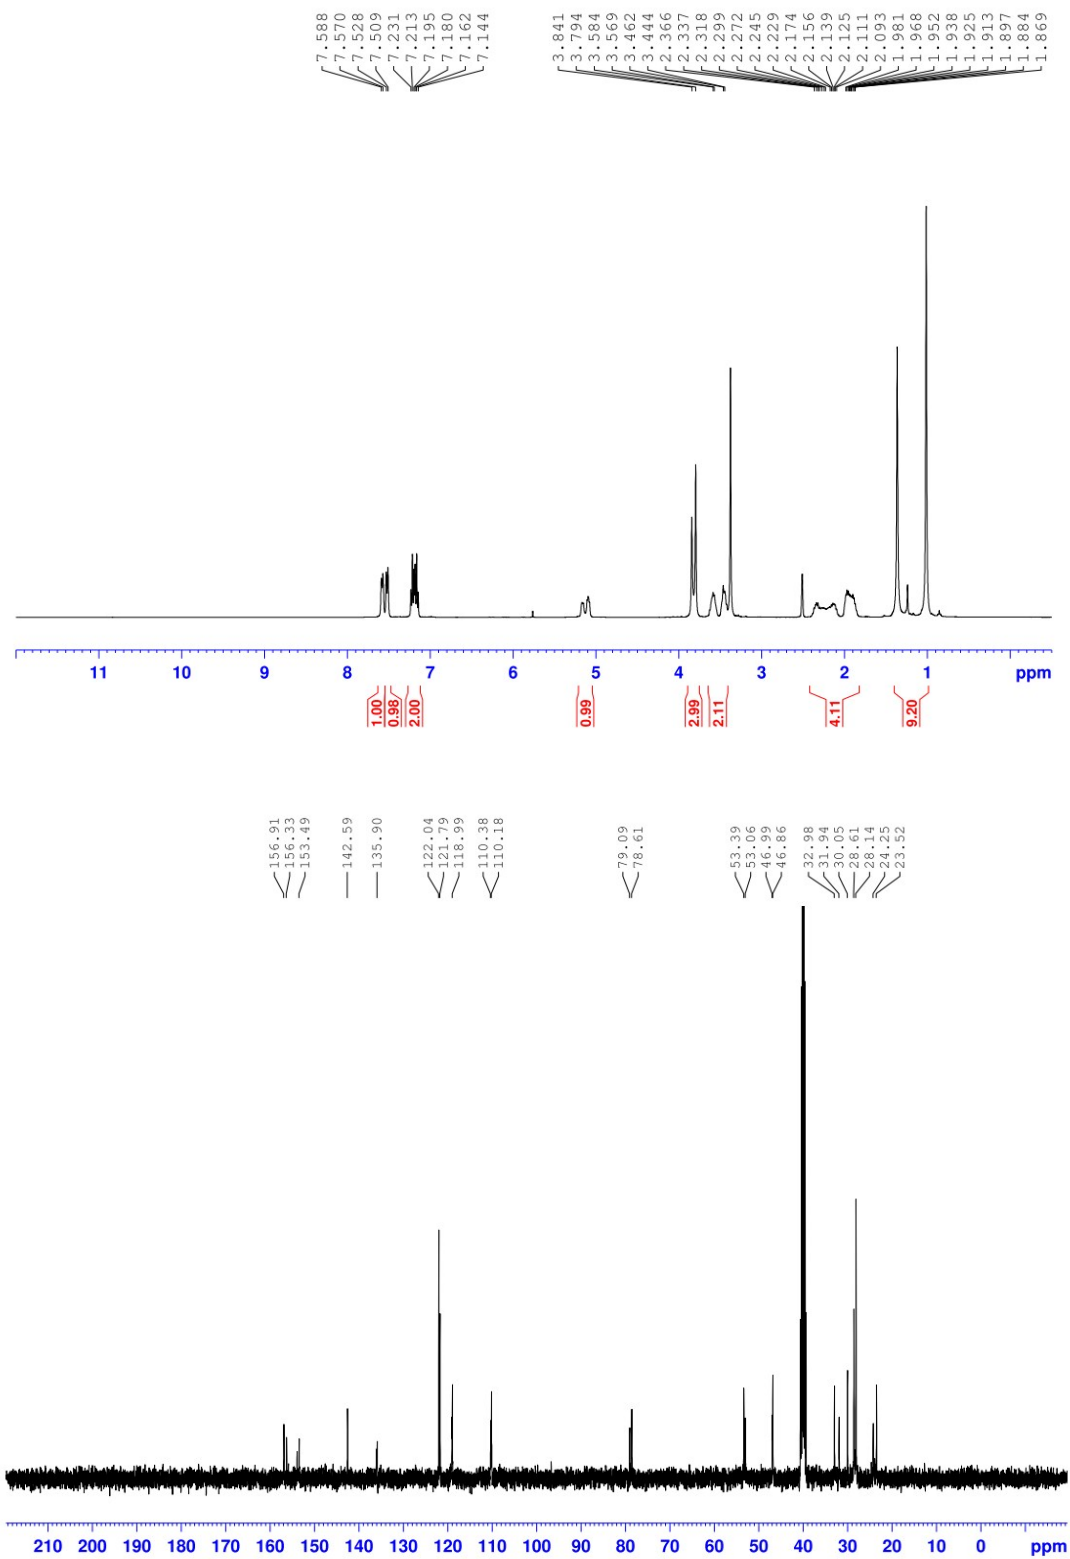

Figure S15. <sup>1</sup>H and <sup>13</sup>C NMR spectra of **2o** in DMSO-*d*<sub>6</sub>.

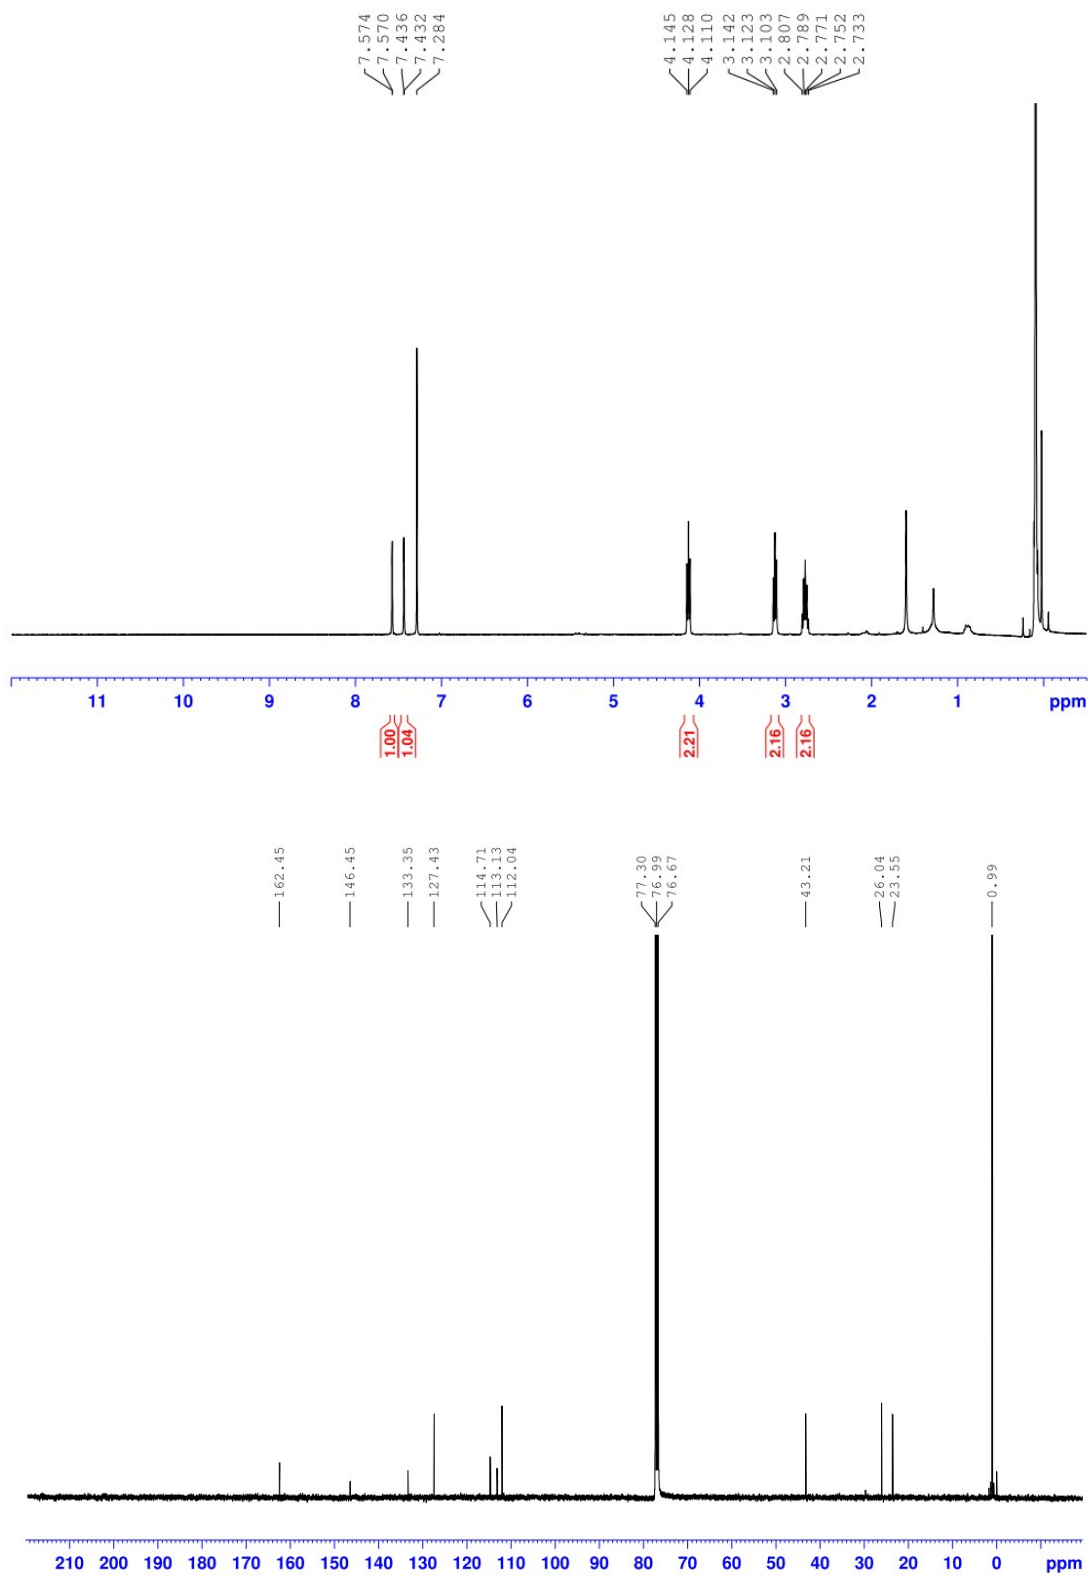

**Figure S16.** <sup>1</sup>H and <sup>13</sup>C NMR spectra of **2p** in CDCl<sub>3</sub>.

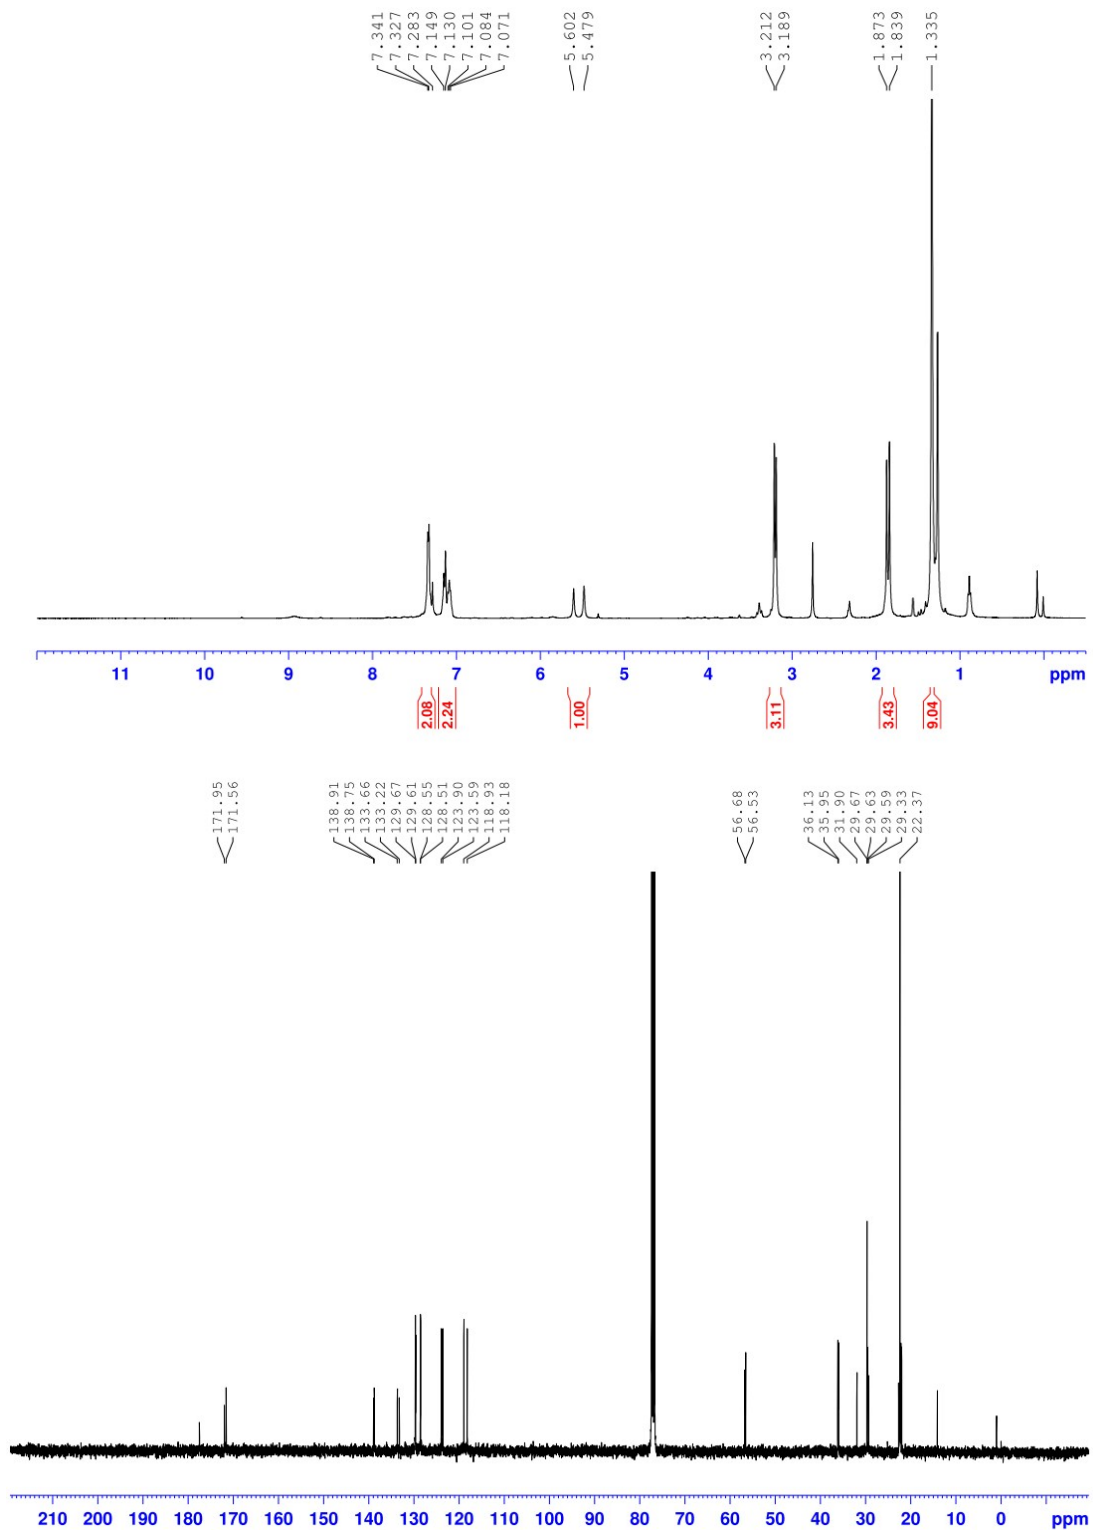

Figure S17.  $^1\text{H}$  and  $^{13}\text{C}$  NMR spectra of **4** in  $\text{CDCl}_3$ .
